# Supplementary material for: The Effect of Epimedium Isopentenyl Flavonoids on the Broiler Gut Health Using Microbiomic and Metabolomic Analyses
Source: MDPI journal article supplement (doi:10.3390/ijms24087646), 2023-04-21
Supplement: s1 [file s1]

## The effect of Epimedium isopentenyl flavonoids on the broiler gut health using microbiomic and metabolomic analyses

Jiaqi Zhang<sup>1,2</sup>, Qingyu Zhao<sup>1,2</sup>, Wei Si<sup>1,2</sup>, Yuchang Qin<sup>1,2</sup>, Huiyan Zhang<sup>1,2\*</sup> and Junmin Zhang<sup>1,2\*</sup>

<sup>1</sup>State Key Laboratory of Animal Nutrition, Institute of Animal Sciences, Chinese Academy of Agricultural Sciences, Beijing 100193, China

<sup>2</sup> Scientific Observing and Experiment Station of Animal Genetic Resources and Nutrition in North China of Ministry of Agriculture and Rural Affairs, Institute of Animal Sciences of Chinese Academy of Agricultural Sciences, Beijing 100193, China

### Supplementary Material

**Supp. Information1:** Qualitative analysis of the main isopentenyl flavonols components of EM by UHPLC-Q-TOF/MS.

**Supp. Information 2:** Quantification of the main isopentenyl flavonol components of EM by UHPLC-QqQ-MS/MS.

**Supp. Information 3:** Quantification of cecal lactic acid by UHPLC-QqQ-MS/MS.

**Supp. Information 4:** Details of the 16S rRNA high-throughput sequencing.

**Supp. Information 5:** Details of the UHPLC-Q Exactive HF-X system for the detection of serum metabolites.

**Figure S1.** The total ion current profiles on positive ions mode (A) and negative ions mode (B) and DAD chromatography (C) of Epimedium extracts for UHPLC-Q-TOF/MS detection.

**Figure S2.** The top five vip value metabolites Pantothenic Acid (A), L-Methionine (B), 1-(1,2,3,4,5-Pentahydroxypent-1-yl)-1,2,3,4-tetrahydro-beta-carboline-3-carboxyl (C), 5-(3',5'-Dihydroxyphenyl)-gamma-valerolactone-O-sulphate-O-methyl (D), Pyrocatechol sulfate (E). Significant differences were recorded by \*  $0.01 < p \leq 0.05$ , \*\*  $0.001 < p \leq 0.01$ , \*\*\*  $p \leq 0.001$ . N = 6 per treatment group.

**Figure S3.** (A) KEGG topology analysis of differential serum metabolites between the CTC and NC groups. (B) KEGG topology analysis of differential serum metabolites between the EM and NC groups.

**Figure S4.** Indicates correlation between serum metabolites and cecum microbes of the first 30 (genus level) that changed significantly between the treatment groups.

**Table S1.** Composition and nutrient levels of experimental diet (% , air-dry basis).

**Table S2.** Total of 48 serum metabolites changed significantly (up and down) after screening that the fold-change value was  $> 2$ , and the  $p$ -value was  $< 0.05$ .

**Supp. Information1:** Qualitative analysis of the main isopentenyl flavonol components of EM by UHPLC-Q-TOF/MS.

UHPLC-Q-TOF/MS was used for qualitative analysis of the main components of EM. The chromatographic separation was performed on Agilent InfinityLab Poroshell 120 SB-C18 column, 2.7  $\mu\text{m}$  particle size and  $2.1 \times 100$  mm i.d. column (Sigma Aldrich, Saint Louis, MO, USA). Aqueous formic acid (0.1% v/v) solution (A) and acetonitrile solution with 0.1% formic acid (B) consisted of mobile phase, with a flow rate of 0.3 mL/min, under gradient elution at 40 °C. The gradient profile was as follows: 1–3 min, 5–20% B; 3–17 min, 20–100% B; 17–22 min, 100% B; 22–22.1 min, 100–5% B; 22.1–23 min, 5% B.

TOF-MS: electrospray ionization source (ESI), scanning mode: positive and negative ions. The MS parameters are as follows: dry gas temperature: 325°C; dry gas flow rate: 6 L/min; desolvent gas flow rate: 800 L/h; capillary voltage: 3.0 kV; collision-induced dissociation voltage: 500 V; collision energy: 20–50 eV; atomizer pressure: 350 psi; auxiliary gas: N<sub>2</sub>; positive and negative reference ion calibration ( $[\text{M}+\text{H}]^+ = 121.0509$  and 922.0098,  $[\text{M}-\text{H}]^- = 112.9859$  and 1033.9881) to ensure accuracy in spectral acquisition. The range of data acquisition is 100 to 1000.

**Supp. Information 2:** Quantification of the main isopentenyl flavonol components of EM by UHPLC-QqQ-MS/MS.

UHPLC-QqQ-MS/MS quantitative analysis

The flavonoid profile analysis was performed using a UHPLC system model 1290 Infinity coupled to a 6545 Triple Quadrupole mass spectrometer (UHPLC-QqQ-MS/MS) equipped with an electrospray ionization (Agilent Technologies, Palo Alto, USA). The chromatographic separation was performed on Agilent InfinityLab Poroshell 120 SB-C18 column, 2.7  $\mu$ m particle size and 2.1  $\times$  100 mm column (Sigma Aldrich, Saint Louis, MO, USA). Aqueous formic acid (0.1% v/v) solution (A) and acetonitrile solution with 0.1% formic acid (B) consisted of mobile phase, with a flow rate of 0.3 mL/min, under gradient elution at 40 °C. The gradient profile was as follows: 0–6 min, 25% B; 6–10 min, 30 % B; 10–12 min, 30-52% B; 12–17 min, 52% B. The injection volume was 10  $\mu$ L. The LC-MS data were acquired using Mass Hunter software (Version 10.0, Agilent Technologies).

Mass spectrometry conditions were as follows: source temperature: 350 °C; gas flow: 6 L/h; nebulizer: 45 psi; sheath gas temperature: 300 °C; sheath gas flow: 10 L/min; capillary: 3500 V; nozzle: 500 V; acceleration cell voltage: 5 V; dwell time: 9.8 ms. Two selected reaction monitoring (SRM) transitions were optimized for each compound identified. The optimal multiple reaction monitoring (MRM) parameters for the target compounds were listed in Table 2.

**Supp. Information 3:** Quantification of cecal lactic acid by UHPLC-QqQ-MS/MS.

The cecal lactic acid analysis was performed using a UHPLC system model 1290 Infinity coupled to a 6545 Triple Quadrupole mass spectrometer (UHPLC-QqQ-MS/MS) equipped with an electrospray ionization (Agilent Technologies, Palo Alto, USA). The chromatographic separation was performed on T3 C18 column (Waters, USA). Aqueous formic acid (0.1% v/v) solution (A) and methanol (B) consisted of mobile phase, with a flow rate of 0.3 mL/min, under gradient elution at 40 °C. The gradient profile was as follows: 0–1 min, 3% B; 1–2.5 min, 3–70 % B; 2.5–4 min, 70–3% B; 4–5 min, 3% B. The injection volume was 1 µL. The LC-MS data were acquired using Mass Hunter software (Version 10.0, Agilent Technologies).

Mass spectrometry conditions were as follows: source temperature: 350 °C; gas flow: 6 L/h; nebulizer: 45 psi; sheath gas temperature: 300 °C; sheath gas flow: 10 L/min; capillary: 3500 V; nozzle: 500 V; acceleration cell voltage: 5 V; dwell time: 9.8 ms. Lactic acid was quantified by MS in negative ion mode, a quantifier ion transition  $m/z$  89.0 → 45.0 and a qualifier 89.0 → 43.1 were used with a fragmentation voltage of 50 V, collision energy of 8 V, and cell accelerator voltage of 5 V.

**Supp. Information 4:** Details of the 16S rRNA high-throughput sequencing.

Total genomic DNA from the cecum samples was extracted by QIAamp DNA Stool Mini Kit (Qiagen, Hilden, Germany). DNA concentration and integrity were detected by NanoDrop Spectrophotometer (Thermo Scientific, Wilmington, DE, USA) and agarose gel electrophoresis, respectively. DNA concentration of each cecal content was diluted to 10 ng/μL using double-distilled water. The V3–V4 region of 16S rDNA was amplified using the following specific primers (338F: 5'-ACTCCTACGGGAGGCAGCAG-3'; 806R: 5'-GGACTACHVGGGTWTCTAAT-3'). Purified amplicons were pooled in equal amounts and paired-end sequenced (2×250 bp) on an Illumina MiSeq platform at Majorbio Bio-Pharm Technology Co. Ltd. (Shanghai, China).

The raw data was uploaded to the NCBI Sequence Read Archive databas (Accession Number: PRJNA904521). QIIME2 (version 2021.8 or higher, <http://qiime2.org>) was used for quality control and analysis of sequence reads. Raw fastq files were demultiplexed using q2-demux and quality filtered and dereplicated with q2-dada2. Sequences with average Phred scores below 25 were removed. The amplified subsequence variants (ASVs) were classified using the q2-feature classifier classify-sklearn naïve Bayes classifier on the SILVA database version 132 (<https://www.arb-silva.de/download/archive/qiime/>). MAFFT was used for sequence comparison of multiple ASVs by q2-alignment, and phylogeny was constructed by q2-phylogeny using fasttree2. To calculate  $\alpha$ - and  $\beta$ -diversity, data were diluted to the lowest number of sequences possible for each sample.  $\alpha$ -diversity was measured by the Shannon index. differences between  $\alpha$ -diversity indices were tested by the Kruskal-Wallis test (QIIME 2). To estimate the similarity of microbial community structure ( $\beta$ -diversity) between groups, a principal coordinate analysis (PCoA) based on a weighted UniFrac distance matrix (QIIME 2) was performed. Partial least squares discriminant analysis (PLS-DA) was conducted to compare the bacterial community structures across all samples. Moreover, the significance of differentiation of microbial structure among groups was statistically tested by analysis of similarity. The linear discriminant analysis (LDA) was coupled with effect size measurements (LEf-Se) to distinguish the bacteria between all the treatments, the LDA score was set at two. To conduct functional prediction analysis of the 16S data, data analysis was performed through the Phylogenetic Investigation of Communities by Reconstruction of Unobserved States (PICRUSt)2 pipeline.

**Supp. Information 5:** Details of the UHPLC-Q Exactive HF-X system for the detection of serum metabolites.

Chromatographic conditions:

2  $\mu$ L of sample was separated by HSS T3 column (100 mm  $\times$  2.1 mm i.d., 1.8  $\mu$ m) and then entered into mass spectrometry detection. The mobile phases consisted of 0.1% formic acid in water:acetonitrile (95:5, v/v) (solvent A) and 0.1% formic acid in acetonitrile:isopropanol:water (47.5:47.5:5, v/v)(solvent B). The solvent gradient changed according to the following conditions: from 0 to 3.5 min, 0% B to 24.5% B (0.4 mL/min); from 3.5 to 5 min, 24.5% B to 65% B (0.4 mL/min); from 5 to 5.5 min, 65% B to 100% B (0.4 mL/min); from 5.5 to 7.4 min, 100% B to 100% B (0.4 mL/min to 0.6 mL/min); from 7.4 to 7.6 min, 100% B to 51.5% B (0.6 mL/min); from 7.6 to 7.8 min, 51.5% B to 0% B (0.6 mL/min to 0.5 mL/min); from 7.8 to 9 min, 0% B to 0% B (0.5 mL/min to 0.4 mL/min); from 9 to 10 min, 0% B to 0% B (0.4 mL/min) for equilibrating the systems. The sample injection volume was 2  $\mu$ L and the flow rate was set to 0.4 mL/min. The column temperature was maintained at 40  $^{\circ}$ C. During the period of analysis, all these samples were stored at 4  $^{\circ}$ C.

MS conditions:

The mass spectrometric data was collected using a Thermo UHPLC -Q Exactive HF-X Mass Spectrometer equipped with an electrospray ionization (ESI) source operating in either positive or negative ion mode. The optimal conditions were set as followed: heater temperature, 425  $^{\circ}$ C ; Capillary temperature, 325  $^{\circ}$ C; sheath gas flow rate, 50 arb; Aux gas flow rate, 13 arb; ion-spray voltage floating (ISVF), -3500V in negative mode and 3500V in positive mode, respectively; Normalized collision energy , 20-40-60V rolling for MS/MS. Full MS resolution was 60000, and MS/MS resolution was 7500. Data acquisition was performed with the Data Dependent Acquisition (DDA) mode. The detection was carried out over a mass range of 70-1050 m/z.

**Figure S1.** The total ion current profiles on positive ions mode (A) and negative ions mode (B) and DAD chromatography (C) of Epimedium extracts for UHPLC-Q-TOF/MS detection.

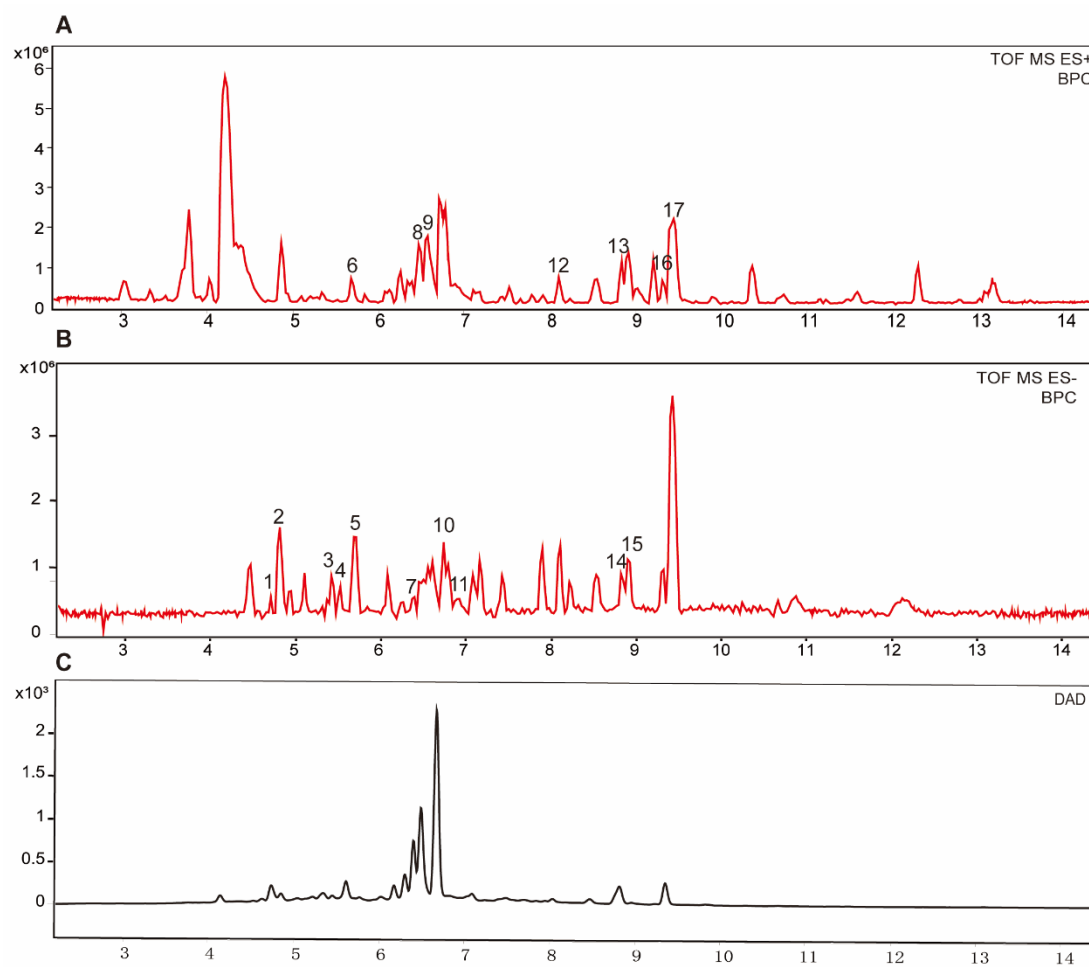

**Figure S2.** The top five vip value metabolites Pantothenic Acid (A), L-Methionine (B), 1-(1,2,3,4,5-Pentahydroxypent-1-yl)-1,2,3,4-tetrahydro-beta-carboline-3-carboxyl (C), 5-(3',5'-Dihydroxyphenyl)-gamma-valerolactone-O-sulphate-O-methyl (D), Pyrocatechol sulfate (E). Significant differences were recorded by  $0.01 < P \leq 0.05^*$ ,  $0.001 < P \leq 0.01^{**}$ ,  $P \leq 0.001^{***}$ . N = 6 per treatment group.

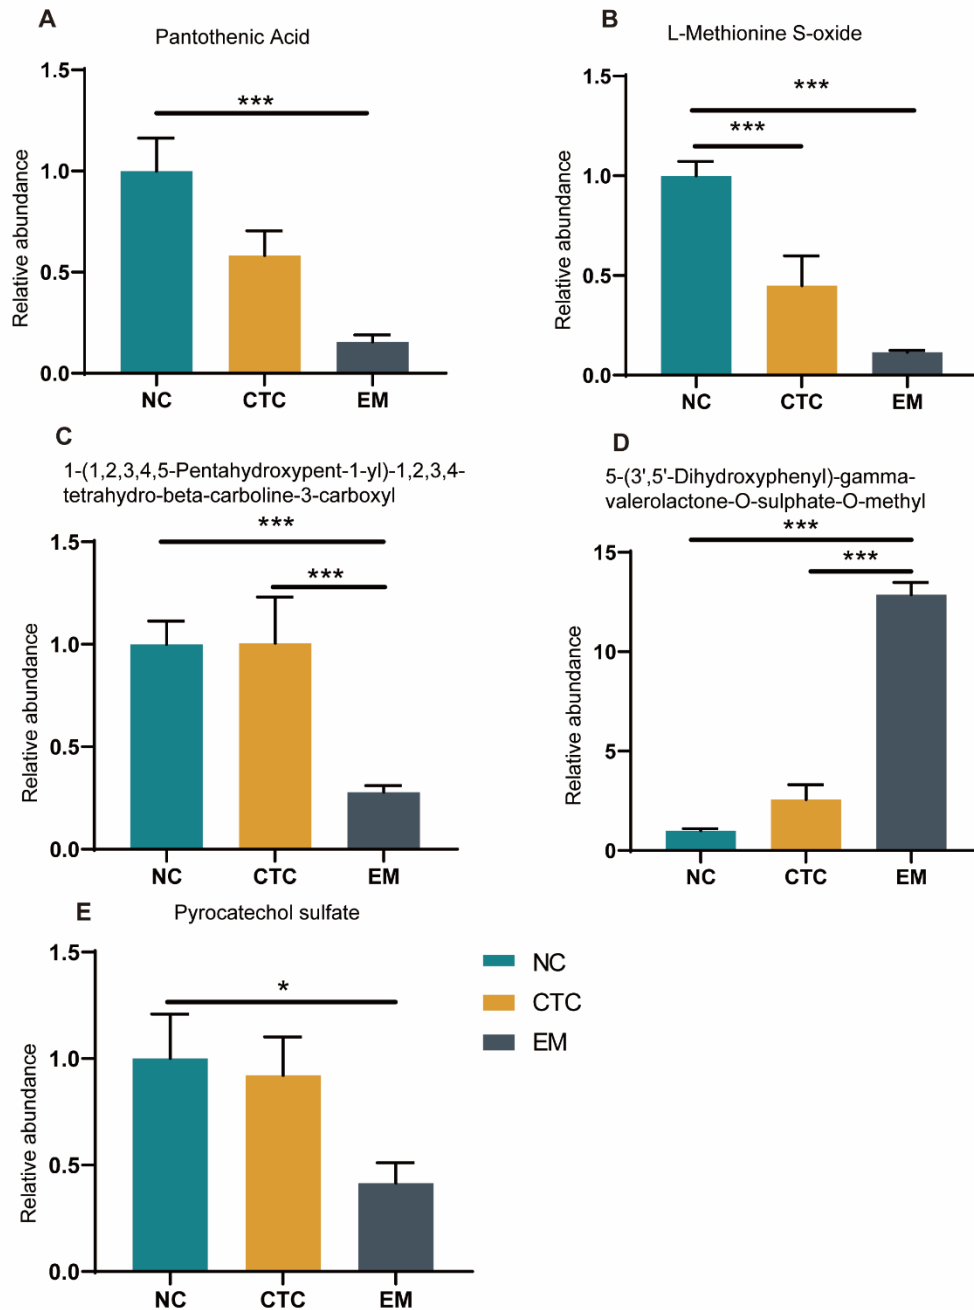



**Figure S3.** (A) KEGG topology analysis of differential serum metabolites between the CTC and NC groups. (B) KEGG topology analysis of differential serum metabolites between the EM and NC groups.

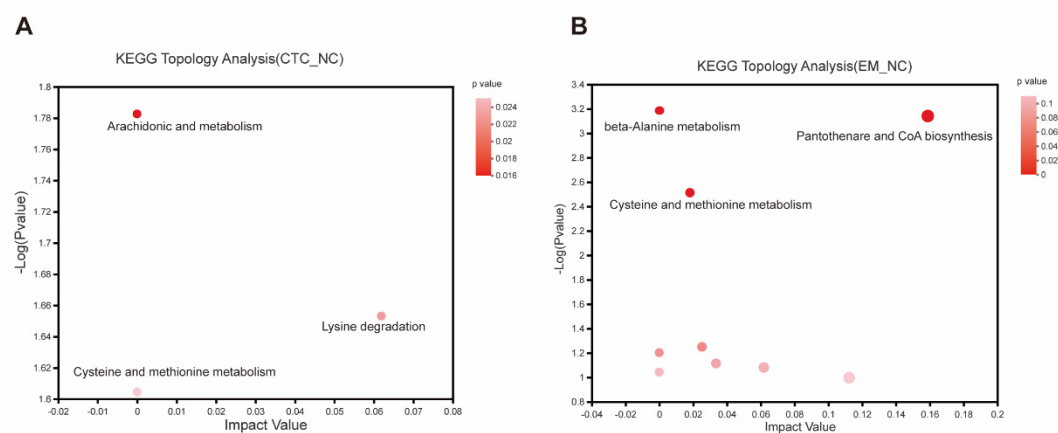

**Figure S4.** Indicates correlation between serum metabolites and cecum microbes of the first 30 (genus level) that changed significantly between the treatment groups.

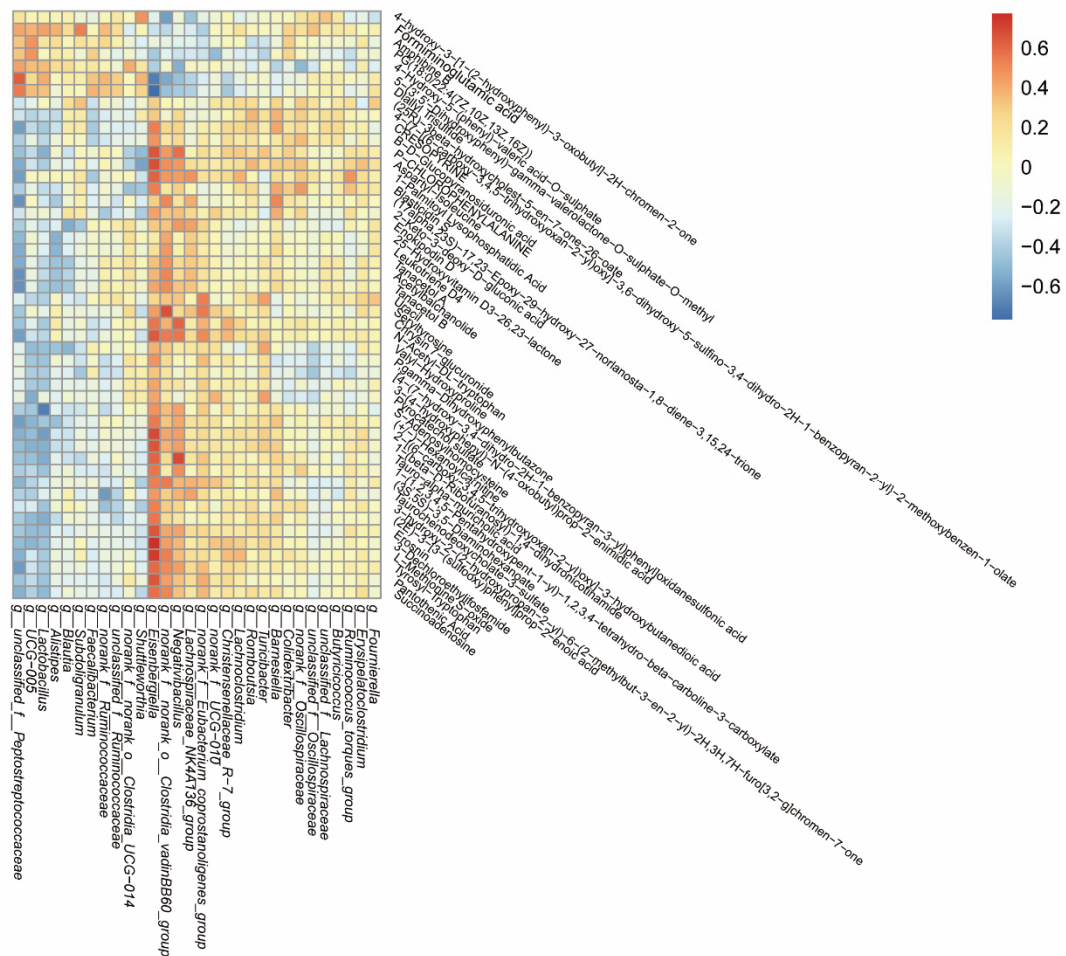

**Supp. Table S1.** Composition and nutrient levels of experimental diet (% air-dry basis).

| Items                       | Starter phase (d 1 to 21) | Grower phase (d 22 to 42) |
|-----------------------------|---------------------------|---------------------------|
| Ingredients                 |                           |                           |
| Corn                        | 55.03                     | 58.58                     |
| Soybean meal                | 32.5                      | 31.7                      |
| Fish meal                   | 4.3                       | 1.8                       |
| Soybean oil                 | 4.2                       | 4                         |
| Dicalcium phosphate         | 1.45                      | 1.7                       |
| Limestone                   | 1.34                      | 1.15                      |
| DL-methionine               | 0.23                      | 0.12                      |
| Sodium chloride             | 0.3                       | 0.3                       |
| Choline chloride            | 0.15                      | 0.15                      |
| Premix <sup>1</sup>         | 0.5                       | 0.5                       |
| Nutrient levels             |                           |                           |
| Metabolizable energy, MJ/kg | 12.77                     | 12.98                     |
| Crude protein, %            | 21.59                     | 20.02                     |
| Calcium, %                  | 1.07                      | 0.94                      |
| Total phosphorus, %         | 0.72                      | 0.69                      |
| Available phosphorus, %     | 0.45                      | 0.41                      |
| Lysine, %                   | 1.21                      | 1.08                      |
| Methionine+Cysteine, %      | 0.94                      | 0.78                      |
| Threonine, %                | 0.83                      | 0.77                      |
| Tryptophan, %               | 0.25                      | 0.24                      |

<sup>1</sup>Premix supplied per kg of diet: vitamin A, 10,000 IU, vitamin D<sub>3</sub>, 3,200 IU, vitamin E, 15 IU, vitamin K<sub>3</sub>, 5 mg, thiamin, 2.1 mg, riboflavin, 7 mg, vitamin B<sub>12</sub>, 0.02 mg, biotin, 0.17 mg, folic acid, 1.5 mg, iron (from FeSO<sub>4</sub>·7H<sub>2</sub>O), 80 mg; copper (from Cu<sub>2</sub>(OH)<sub>3</sub>Cl), 20 mg; zinc (from ZnSO<sub>4</sub>·H<sub>2</sub>O), 90 mg; manganese (from MnSO<sub>4</sub>·H<sub>2</sub>O), 80 mg; iodine (from KI), 0.4 mg; selenium (from Na<sub>2</sub>SeO<sub>3</sub>), 0.4 mg.

**Supp. Table S2.** Total of 48 serum metabolites changed significantly (up and down) after screening that the fold-change value was >2, and the *P*-value was <0.05<sup>1</sup>.

| No | Metabolite                                                                                  | Formula                                                       | Related category                    | RT<br>(min) | Mass<br>(m/z) | Ion<br>mode        | CTC VS NC         |                | EM VS NC |                |
|----|---------------------------------------------------------------------------------------------|---------------------------------------------------------------|-------------------------------------|-------------|---------------|--------------------|-------------------|----------------|----------|----------------|
|    |                                                                                             |                                                               |                                     |             |               |                    | Trend             | Fold<br>change | Trend    | Fold<br>change |
| 1  | Pantothenic Acid                                                                            | C <sub>9</sub> H <sub>17</sub> NO <sub>5</sub>                | Organic oxygen<br>compounds         | 2.93        | 220.12        | [M+H] <sup>+</sup> | down <sup>2</sup> | 0.583          | down     | 0.155          |
| 2  | Valyl-Hydroxyproline                                                                        | C <sub>10</sub> H <sub>18</sub> N <sub>2</sub> O <sub>4</sub> | Organic acids and<br>derivatives    | 2.85        | 231.13        | [M+H] <sup>+</sup> | down              | 0.593          | down     | 0.397          |
| 3  | L-Methionine S-oxide                                                                        | C <sub>5</sub> H <sub>11</sub> NO <sub>3</sub> S              | Organic acids and<br>derivatives    | 1.22        | 148.04        | [M+H] <sup>+</sup> | down              | 0.448          | down     | 0.115          |
| 4  | Tauro-alpha-muricholic acid                                                                 | C <sub>26</sub> H <sub>45</sub> NO <sub>7</sub> S             | Lipids and lipid-<br>like molecules | 6.22        | 533.33        | [M+H] <sup>+</sup> | down              | 0.835          | down     | 0.191          |
| 5  | P,gamma-<br>Dihydroxyphenylbutazone                                                         | C <sub>19</sub> H <sub>20</sub> N <sub>2</sub> O <sub>4</sub> | other                               | 6.1         | 341.15        | [M+H] <sup>+</sup> | down              | 0.506          | down     | 0.096          |
| 6  | CRESOPYRINE                                                                                 | C <sub>10</sub> H <sub>10</sub> O <sub>4</sub>                | other                               | 2.78        | 212.09        | [M+H] <sup>+</sup> | down              | 1.036          | down     | 0.476          |
| 7  | 1-(1,2,3,4,5-Pentahydroxypent-<br>1-yl)-1,2,3,4-tetrahydro-beta-<br>carboline-3-carboxylate | C <sub>17</sub> H <sub>22</sub> N <sub>2</sub> O <sub>7</sub> | other                               | 3.16        | 367.15        | [M+H] <sup>+</sup> | down              | 1.005          | down     | 0.279          |
| 8  | 3-(4-hydroxyphenyl)-N-(4-<br>oxobutyl)prop-2-enimidic acid                                  | C <sub>13</sub> H <sub>15</sub> NO <sub>3</sub>               | other                               | 3.49        | 251.14        | [M+H] <sup>+</sup> | down              | 0.623          | down     | 0.388          |
| 9  | 5-(3',5'-Dihydroxyphenyl)-<br>gamma-valerolactone-O-<br>sulphate-O-methyl                   | C <sub>12</sub> H <sub>14</sub> O <sub>7</sub> S              | Organic acids and<br>derivatives    | 1.12        | 347.02        | [M+H] <sup>+</sup> | up <sup>3</sup>   | 2.561          | up       | 12.862         |
| 10 | Erosnin                                                                                     | C <sub>18</sub> H <sub>8</sub> O <sub>6</sub>                 | Phenylpropanoids<br>and polyketides | 1.62        | 359           | [M+H] <sup>+</sup> | down              | 0.519          | down     | 0.162          |

|    |                                                                        |                                                                  |                                         |      |        |                    |      |       |      |       |
|----|------------------------------------------------------------------------|------------------------------------------------------------------|-----------------------------------------|------|--------|--------------------|------|-------|------|-------|
| 11 | 3-Dechloroethylfosfamide                                               | C <sub>5</sub> H <sub>12</sub> ClN <sub>2</sub> O <sub>2</sub> P | other                                   | 1.72 | 397.07 | [M+H] <sup>+</sup> | down | 0.542 | down | 0.100 |
| 12 | 2-[(6-carboxy-3,4,5-trihydroxyoxan-2-yl)oxy]-3-hydroxybutanedioic acid | C <sub>10</sub> H <sub>14</sub> O <sub>12</sub>                  | other                                   | 2.35 | 371.02 | [M+H] <sup>+</sup> | down | 0.614 | down | 0.263 |
| 13 | Uracil                                                                 | C <sub>4</sub> H <sub>4</sub> N <sub>2</sub> O <sub>2</sub>      | Organoheterocyclic compounds            | 2.35 | 113.04 | [M+H] <sup>+</sup> | down | 0.606 | down | 0.499 |
| 14 | Blasticidin S                                                          | C <sub>17</sub> H <sub>26</sub> N <sub>8</sub> O <sub>5</sub>    | Organic acids and derivatives           | 2.76 | 486.22 | [M+H] <sup>+</sup> | down | 0.740 | down | 0.340 |
| 15 | B-D-Glucopyranosiduronic acid                                          | C <sub>15</sub> H <sub>21</sub> NO <sub>8</sub>                  | other                                   | 2.77 | 344.13 | [M+H] <sup>+</sup> | up   | 1.413 | down | 0.332 |
| 16 | Succinoadenosine                                                       | C <sub>14</sub> H <sub>17</sub> N <sub>5</sub> O <sub>8</sub>    | Nucleosides, nucleotides, and analogues | 2.93 | 384.12 | [M+H] <sup>+</sup> | down | 0.634 | down | 0.234 |
| 17 | Tyrosyl-Tryptophan                                                     | C <sub>20</sub> H <sub>21</sub> N <sub>3</sub> O <sub>4</sub>    | Organic acids and derivatives           | 3.26 | 409.19 | [M+H] <sup>+</sup> | down | 0.515 | down | 0.099 |
| 18 | (+/-)-Hexanoylcarnitine                                                | C <sub>13</sub> H <sub>25</sub> NO <sub>4</sub>                  | other                                   | 4.44 | 260.19 | [M+H] <sup>+</sup> | down | 0.333 | down | 0.118 |
| 19 | Chrysin 7-glucuronide                                                  | C <sub>21</sub> H <sub>18</sub> O <sub>10</sub>                  | other                                   | 4.91 | 431.1  | [M+H] <sup>+</sup> | down | 0.879 | down | 0.225 |
| 20 | P-CHLOROPHENYLALANINE                                                  | C <sub>9</sub> H <sub>10</sub> ClNO <sub>2</sub>                 | Phenylpropanoids and polyketides        | 5.85 | 200.05 | [M+H] <sup>+</sup> | down | 0.595 | down | 0.476 |
| 21 | Acetylbalchanolide                                                     | C <sub>17</sub> H <sub>24</sub> O <sub>4</sub>                   | Lipids and lipid-like molecules         | 6.06 | 310.2  | [M+H] <sup>+</sup> | down | 0.350 | down | 0.198 |
| 22 | (3S,5S)-3,5-Diaminohexanoate                                           | C <sub>6</sub> H <sub>14</sub> N <sub>2</sub> O <sub>2</sub>     | Organic acids and derivatives           | 6.6  | 111.09 | [M+H] <sup>+</sup> | down | 0.485 | down | 0.313 |
| 23 | Amphibine B                                                            | C <sub>39</sub> H <sub>47</sub> N <sub>5</sub> O <sub>5</sub>    | other                                   | 6.97 | 666.37 | [M+H] <sup>+</sup> | down | 0.750 | up   | 2.353 |
| 24 | PG(18:0/22:4(7Z,10Z,13Z,16Z))                                          | C <sub>46</sub> H <sub>83</sub> O <sub>10</sub> P                | Lipids and lipid-like molecules         | 7.87 | 865.53 | [M+H] <sup>+</sup> | up   | 1.267 | up   | 2.009 |

|    |                                                                                                |                                                                 |                                 |      |        |                    |      |       |      |       |
|----|------------------------------------------------------------------------------------------------|-----------------------------------------------------------------|---------------------------------|------|--------|--------------------|------|-------|------|-------|
| 25 | Diallyl Trisulfide                                                                             | C <sub>6</sub> H <sub>10</sub> S <sub>3</sub>                   | Organosulfur compounds          | 9.99 | 179    | [M+H] <sup>+</sup> | up   | 1.262 | up   | 5.023 |
| 26 | (17alpha,23S)-17,23-Epoxy-29-hydroxy-27-norlanosta-1,8-diene-3,15,24-trione                    | C <sub>29</sub> H <sub>40</sub> O <sub>5</sub>                  | Lipids and lipid-like molecules | 6.68 | 507.25 | [M+H] <sup>+</sup> | down | 0.701 | down | 0.497 |
| 27 | 25-Hydroxyvitamin D3-26,23-lactone                                                             | C <sub>27</sub> H <sub>40</sub> O <sub>4</sub>                  | Lipids and lipid-like molecules | 6.67 | 492.31 | [M+H] <sup>+</sup> | down | 0.632 | down | 0.491 |
| 28 | Leukotriene D4                                                                                 | C <sub>25</sub> H <sub>40</sub> N <sub>2</sub> O <sub>6</sub> S | Lipids and lipid-like molecules | 6.67 | 514.29 | [M+H] <sup>+</sup> | down | 0.448 | down | 0.293 |
| 29 | Tanacetol B                                                                                    | C <sub>17</sub> H <sub>28</sub> O <sub>4</sub>                  | Lipids and lipid-like molecules | 6.22 | 314.23 | [M+H] <sup>+</sup> | down | 0.402 | down | 0.210 |
| 30 | Tanacetol A                                                                                    | C <sub>17</sub> H <sub>26</sub> O <sub>4</sub>                  | Lipids and lipid-like molecules | 6.12 | 312.22 | [M+H] <sup>+</sup> | down | 0.396 | down | 0.206 |
| 31 | N-Acetyl-DL-tryptophan                                                                         | C <sub>13</sub> H <sub>14</sub> N <sub>2</sub> O <sub>3</sub>   | other                           | 5.09 | 247.11 | [M+H] <sup>+</sup> | down | 0.473 | down | 0.100 |
| 32 | Seryltyrosine                                                                                  | C <sub>12</sub> H <sub>16</sub> N <sub>2</sub> O <sub>5</sub>   | Organic acids and derivatives   | 4.25 | 251.1  | [M+H] <sup>+</sup> | down | 0.352 | down | 0.146 |
| 33 | Enokipodin D                                                                                   | C <sub>15</sub> H <sub>18</sub> O <sub>4</sub>                  | Lipids and lipid-like molecules | 3.6  | 280.16 | [M+H] <sup>+</sup> | down | 0.302 | down | 0.328 |
| 34 | 1-(beta-D-Ribofuranosyl)-1,4-dihydronicotinamide                                               | C <sub>11</sub> H <sub>16</sub> N <sub>2</sub> O <sub>5</sub>   | Organic oxygen compounds        | 2.75 | 257.11 | [M+H] <sup>+</sup> | down | 0.709 | down | 0.316 |
| 35 | 3-hydroxy-2-(2-hydroxypropan-2-yl)-6-(2-methylbut-3-en-2-yl)-2H,3H,7H-furo[3,2-g]chromen-7-one | C <sub>19</sub> H <sub>22</sub> O <sub>5</sub>                  | other                           | 2.74 | 375.12 | [M+H] <sup>+</sup> | down | 1.028 | down | 0.375 |

|    |                                                                                                                                    |                                                                 |                                  |      |        |                    |      |       |      |       |
|----|------------------------------------------------------------------------------------------------------------------------------------|-----------------------------------------------------------------|----------------------------------|------|--------|--------------------|------|-------|------|-------|
| 36 | (2E)-3-[3-(sulfooxy)phenyl]prop-2-enoic acid                                                                                       | C <sub>9</sub> H <sub>8</sub> O <sub>6</sub> S                  | Phenylpropanoids and polyketides | 2.53 | 262.04 | +                  | down | 0.893 | down | 0.313 |
| 37 | S-Adenosylhomocysteine                                                                                                             | C <sub>14</sub> H <sub>20</sub> N <sub>6</sub> O <sub>5</sub> S | Organoheterocyclic compounds     | 2.46 | 385.13 | [M+H] <sup>+</sup> | down | 0.948 | down | 0.357 |
| 38 | Aspartyl-Isoleucine                                                                                                                | C <sub>10</sub> H <sub>18</sub> N <sub>2</sub> O <sub>5</sub>   | Organic acids and derivatives    | 2.28 | 229.12 | [M+H] <sup>+</sup> | down | 0.678 | down | 0.315 |
| 39 | 4-{7-[(6-carboxy-3,4,5-trihydroxyoxan-2-yl)oxy]-3,6-dihydroxy-5-sulfinyl-3,4-dihydro-2H-1-benzopyran-2-yl}-2-methoxybenzen-1-olate | C <sub>22</sub> H <sub>24</sub> O <sub>14</sub> S               | other                            | 2.28 | 527.08 | [M+H] <sup>+</sup> | up   | 1.708 | down | 0.221 |
| 40 | 4-hydroxy-3-[1-(2-hydroxyphenyl)-3-oxobutyl]-2H-chromen-2-one                                                                      | C <sub>19</sub> H <sub>16</sub> O <sub>5</sub>                  | other                            | 1.01 | 347.09 | [M+H] <sup>+</sup> | up   | 3.495 | up   | 2.175 |
| 41 | Taurochenodeoxycholate-3-sulfate                                                                                                   | C <sub>26</sub> H <sub>45</sub> NO <sub>9</sub> S <sub>2</sub>  | Lipids and lipid-like molecules  | 6.4  | 288.62 | [M-H] <sup>-</sup> | down | 0.707 | down | 0.129 |
| 42 | Pyrocatechol sulfate                                                                                                               | C <sub>6</sub> H <sub>6</sub> O <sub>5</sub> S                  | Organic acids and derivatives    | 3.23 | 188.99 | [M-H] <sup>-</sup> | down | 0.922 | down | 0.415 |
| 43 | [4-(7-hydroxy-3,4-dihydro-2H-1-benzopyran-3-yl)phenyl]oxidanesulfonic acid                                                         | C <sub>15</sub> H <sub>14</sub> O <sub>6</sub> S                | other                            | 5.73 | 321.04 | [M-H] <sup>-</sup> | down | 0.902 | down | 0.485 |
| 44 | 1-Palmitoyl Lysophosphatidic Acid                                                                                                  | C <sub>19</sub> H <sub>39</sub> O <sub>7</sub> P                | other                            | 7.12 | 409.23 | [M-H] <sup>-</sup> | down | 0.674 | down | 0.487 |
| 45 | (25R)-3β-hydroxycholest-5-en-7-one-26-oate                                                                                         | C <sub>27</sub> H <sub>42</sub> O <sub>4</sub>                  | Lipids and lipid-like molecules  | 6.65 | 429.3  | [M-H] <sup>-</sup> | up   | 1.258 | down | 0.385 |

|    |                                              |                                                              |                               |      |        |                    |      |       |      |        |
|----|----------------------------------------------|--------------------------------------------------------------|-------------------------------|------|--------|--------------------|------|-------|------|--------|
| 46 | 4-Hydroxy-5-(phenyl)-valeric acid-O-sulphate | C <sub>11</sub> H <sub>14</sub> O <sub>6</sub> S             | Benzenoids                    | 6.06 | 255.03 | [M-H] <sup>-</sup> | down | 6.891 | up   | 89.008 |
| 47 | Formiminoglutamic acid                       | C <sub>6</sub> H <sub>10</sub> N <sub>2</sub> O <sub>4</sub> | Organic acids and derivatives | 1.1  | 173.06 | [M-H] <sup>-</sup> | up   | 1.315 | up   | 2.214  |
| 48 | 2-Keto-3-deoxy-D-gluconic acid               | C <sub>6</sub> H <sub>10</sub> O <sub>6</sub>                | Organic acids and derivatives | 1.09 | 177.04 | [M-H] <sup>-</sup> | down | 0.729 | down | 0.416  |

<sup>1</sup>NC: basal diet; CTC: basal diet + 75 mg/kg chlortetracycline; EM: basal diet + 200 mg/kg epimedium extract. <sup>2</sup>The distinguished metabolite was down-regulated in the CTC group compared to the NC group. <sup>3</sup>The distinguished metabolite was up-regulated in the EM group compared to the NC group.
